# Supplementary material
Source: PubMed Central journal article supplement (PMC4248860)
Supplement: JB.02215-14_zjb999093406so1.pdf [file JB.02215-14_zjb999093406so1.pdf]

# SUPPLEMENT

## Identification of permissive sites

The identification of permissive sites in *aadA* and *natI* was performed in similar manner as for APH described in Material and Methods.

Successful transposon insertions in *aadA* could be detected loss of spectinomycin resistance. We identified 5000 clones that had lost their spectinomycin resistance, indicating transposon integration into *aadA* or its promoter region. To confirm the variability of our library, we sequenced a subset of clones and found that transposon insertions appeared to be distributed randomly throughout the ANT coding sequence (Fig. 6A). If these insertions are assumed to be completely random, we expect near complete coverage of the possible insertion sites within *aadA*, allowing us to screen through many possible sites for those permissive for insertion.

The plasmids of spectinomycin sensitive clones were pooled and the transposon was removed from *aadA* by digesting with restriction endonuclease Pme I. Again, after religation of the plasmids, a pentapeptide insertion scar that includes a Pme I restriction site remains at the former transposon integration site.

Transformation of the library and selection for regained resistance to 100 µg/ml spectinomycin only allows for the growth of colonies whose pentapeptide insertion is in an ANT site that is at least partially permissive. Clones with insertions that significantly disturb ANT folding or function will not grow on 100 µg/ml spectinomycin. The wild-type pAMS1 plasmid confers resistance to more than 10,000 µg/ml spectinomycin. Sequencing of 40 resistant clones revealed three distinct hotspots in the protein that are permissive for pentapeptide insertion (Supplementary Fig. S4B)

To clone Im7 into the pentapeptide insertion library, plasmids from the library were pooled, purified, and digested with Pme I (which cuts inside the pentapeptide insertion), then ligated with wild-type Im7 flanked by 17 amino acid GS linkers. The resulting plasmids were transformed into *E. coli* and selected on plates containing 100 µg/ml spectinomycin, only allowing growth of clones that had Im7 insertions in a permissive site in ANT.

*NatI* linker scanning was done with the Mutation Generation System (MGS) Kit (Thermoscientific), which inserts Not I-containing linkers instead of Pme I-containing linkers.

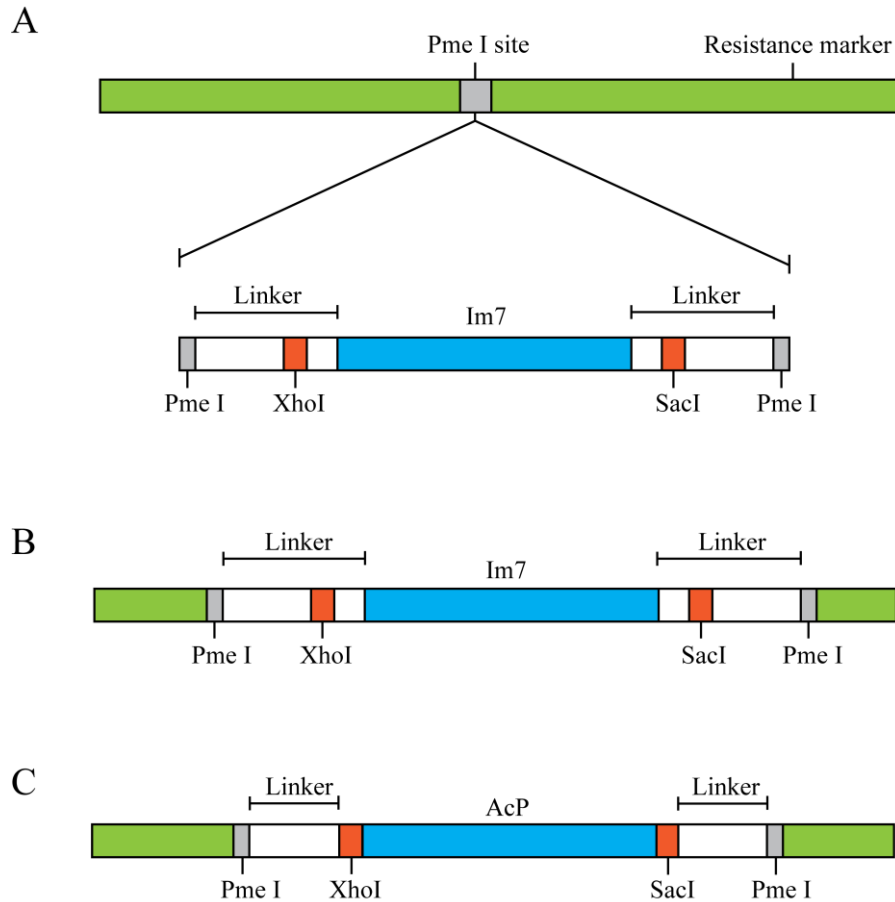

**Supplementary Fig. S1:**

**A** The pentapeptide library of the resistance markers ANT and Kan<sup>R</sup> (green) contains a Pme I site (grey) that is left behind after transposon excision. The Im7 construct we inserted into the pentapeptide library has Pme I sites (grey) on both sides of the protein and flexible GS-linkers (white). **B** The ANT biosensor after the insertion of the Im7 construct in the pentapeptide library (pAMS2 has the insertion at amino acid 155 of ANT). The Im7 construct is set up in such a way that the guest protein can be easily switched. The GS linkers contain Xho I and Sac I restriction sites (red), allowing directional cloning of new guest proteins. By digest with the two enzymes the majority of the linker is left behind in the resistance marker and allows simple substitution of new guest proteins. **C** ANT biosensor after Im7 was exchanged with AcP (pAMS34).

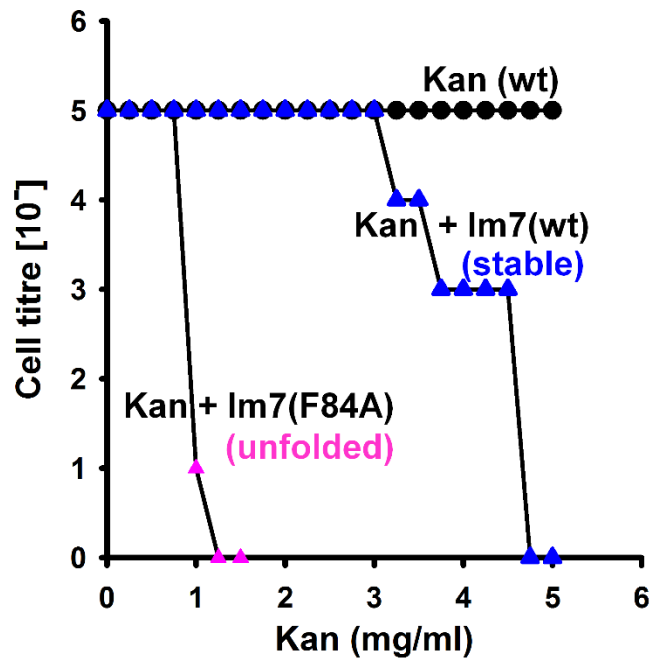

### Supplementary Fig. S2

Comparison of antibiotic resistance in the kanamycin based biosensor. Cells expressing The unfolded Im7 variant F84A have a much lower antibiotic resistance than cells expressing the biosensor with Im7 wt. Maximal cell dilution of the cultures expressing Im7 (WT) and (F84A)- sandwich fusion at position 55 that allowed growth on different concentration of kanamycin shown with blue triangle and purple triangle, respectively. B121 (DE3)-RIPL strain expressing wt Im7 (stable) (AM235) and its unfolded variant F84A (AM236) fused at position 55 of the APH protein. Cultures were grown to mid-log phase and normalized to  $A_{600}=1$ . Cultures were 10 fold serially diluted from  $10^0$  to  $10^5$  were spotted on various concentration of kanamycin containing LB plates. Incubation was made 24 hrs at 37°C. At each dilution, growth or no growth was counted on each kanamycin plates to calculate MIC values.

A

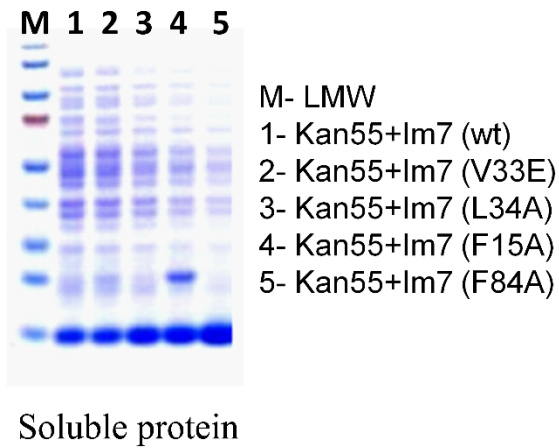

B

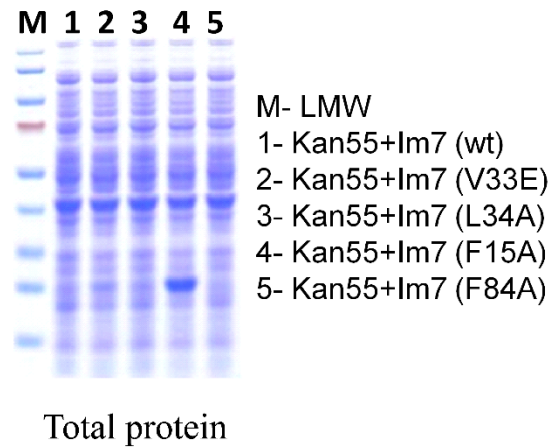

**Supplement Fig. S3:**

Loading control of soluble and total cell extract. (A) Soluble protein from cultures expressing Kan::Im7 variants was extracted by enzymatic treatment and glass bead grilling. Equal amount of soluble protein was analyzed on SDS-PAGE by Coomassie Blue staining (B) Whole cell expressing Kan::Im7 variants were boiled with SDS-loading dye and 15 ul was analyzed on SDS-PAGE by Coomassie Blue staining. For both A and B lane 1, AM235; lane 2, AM240; lane 3, AM 258; lane 4, AM247 and lane 5, AM236

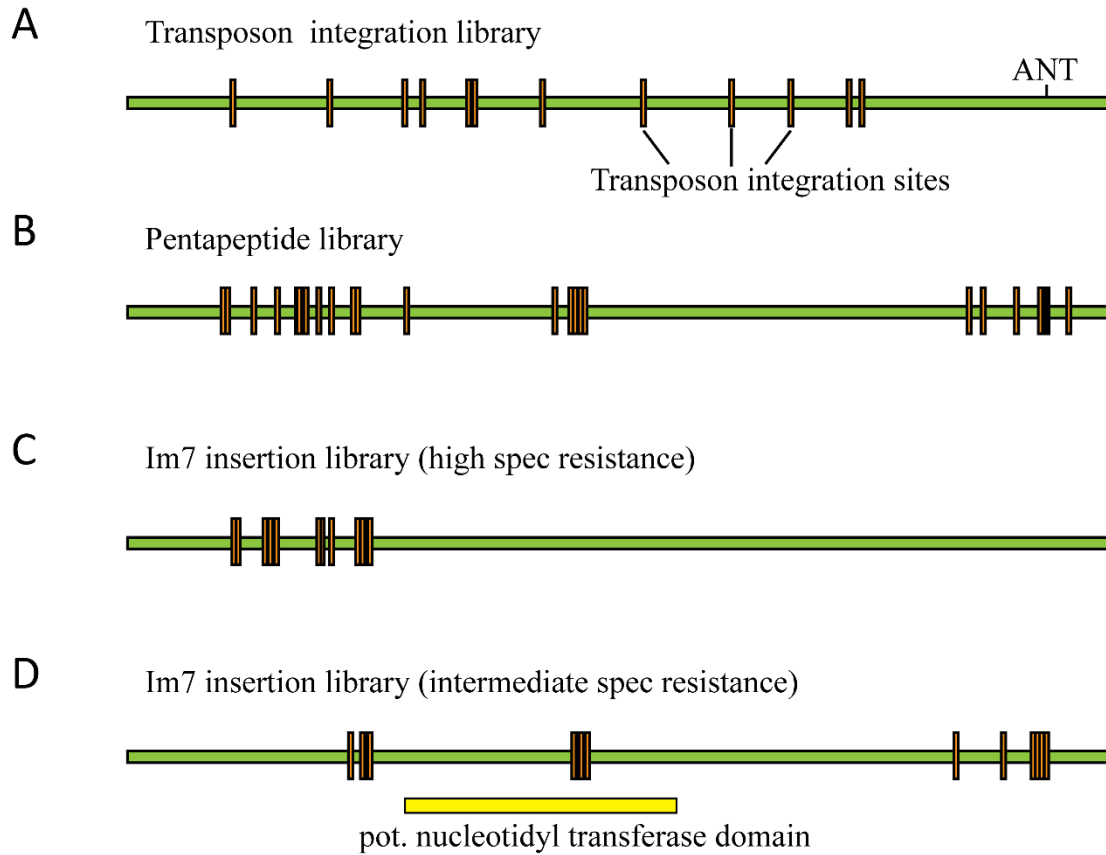

### Supplementary Fig. S4

Transposon insertion sites during the identification of permissive sites in ANT. (A) Transposon integration sites (orange) seem to be randomly distributed throughout the ANT coding sequence (green). (B) Permissive sites in the pentapeptide library (orange) are found in three hotspots in ANT. (C) Im7 insertion sites (orange) and high spectinomycin resistance have insertions exclusively in the N terminus of ANT. (D) Im7 insertions with intermediate spectinomycin resistance have insertions in three hotspots of ANT. While insertions in the middle and the C terminus were all in-frame, all insertions in the N terminus led to frame shifts in ANT. It is possible that these clones use a downstream start codon to express a truncated version of ANT that confers lower levels of spectinomycin resistance.

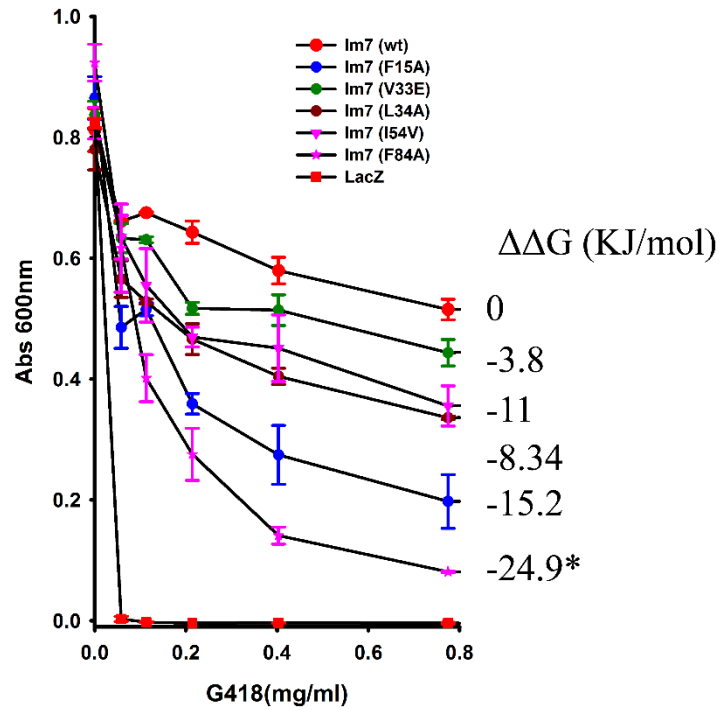

**Supplementary Fig. S5:**

Growth inhibition in *S. cerevisiae* expressing tripartite fusion under G418 selection pressure.

From top to bottom in the graph, Im7 variants were wt, V33E, I54V, L34A, F15A and F84A,

corresponding to strains [ApYC 29](#), [34](#), [39,35](#), [30](#) and [42](#). Negative control expressing lacZ

([ApYC43](#)) showed with hexagon

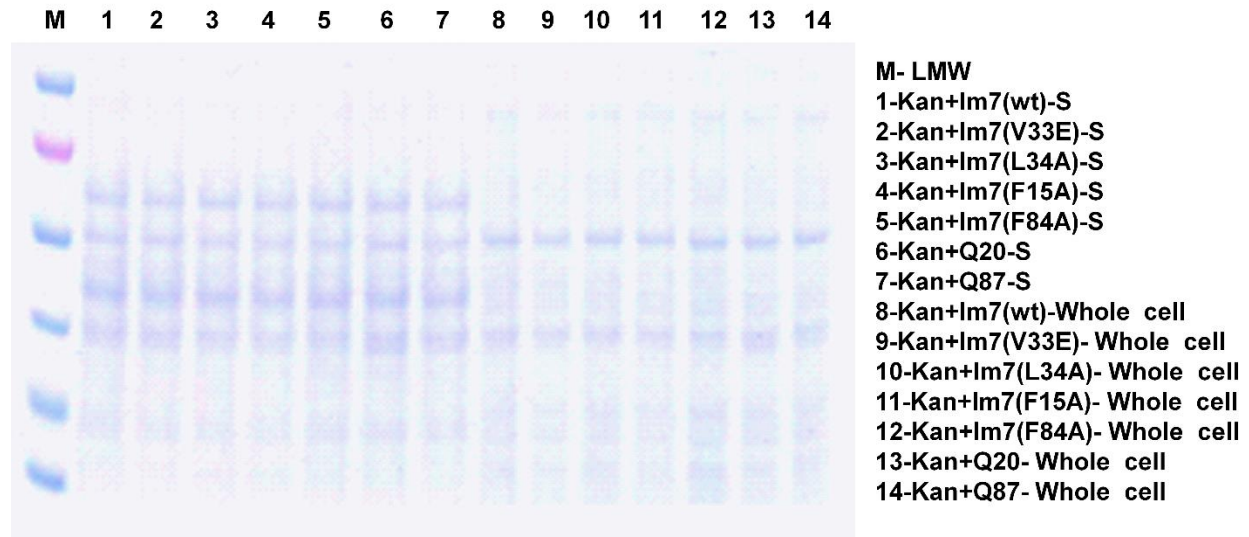

**Supplementary Fig. S6:**

Loading control of soluble and total cell extract of *S. cerevisiae*. Lanes 1-7, soluble protein from *S. cerevisiae* expressing Kan::Im7 variants were isolated by treatment with yeast lysis solution; lanes 8-14, *S. cerevisiae* pellets boiled with SDS loading dye. From each sample, equal volume was loaded on SDS-PAGE and stained with Coomassie Blue. List all strains by number( Stains analysed in lanes 1-7 and 8-14 were [Ap](#)YC29,34,35,30,42,44 and 46)



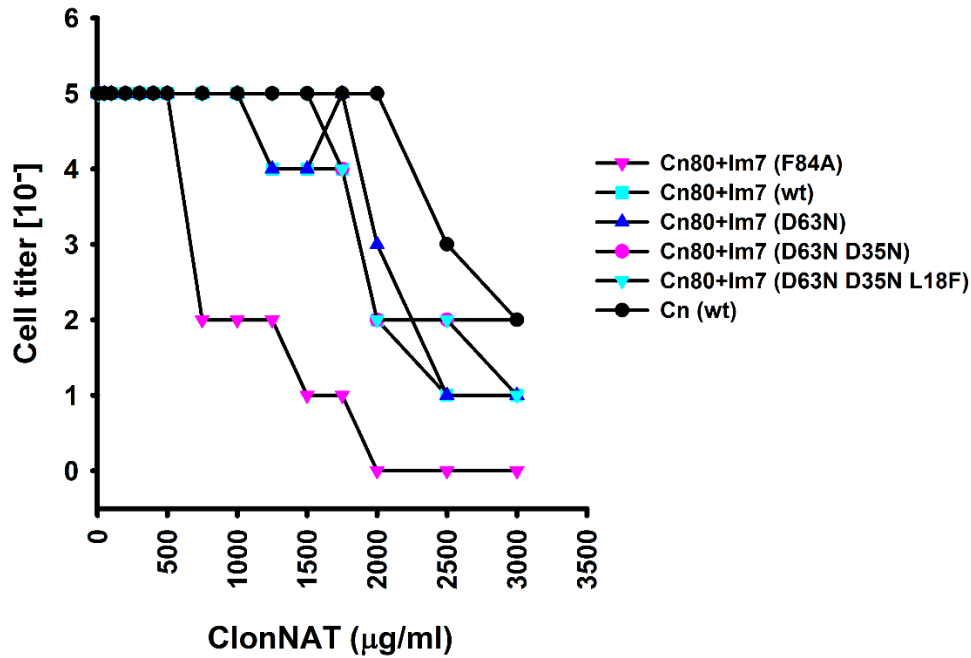

**Supplementary Fig. S7:**

Antibiotic resistance of Cn::Im7 variants. The antibiotic resistance of wild type Cn ([ApYC53](#)) showed with circle. Im7 wt fused at Cn80 ([ApYC48](#)) showed with cyan square, Im7 F15A ([ApYC47](#)) with inverted blue triangle, Im7 D63N ([ApYC50](#)) with blue triangle, Im7 D63N D35N ([ApYC51](#)) with pink circle and Im7 D63N D35N L18F ([ApYC52](#)) with inverted cyan triangle.

**Supplement Table S1: Primers**

|     |                                                         |
|-----|---------------------------------------------------------|
| P1  | CAGTTTAAGGTTTAATCCTATAAAAGAG                            |
| P2  | CTCTTTTATAGGATTAACCTTAAACTG                             |
| P9  | TTCAATTTCTTAAGAAGTTGAACAGCCTCAGCCTCTGTGTAATCACTAATA     |
| P10 | TTCGAGTAACACATCTAACTCATCATCAGTTGCAGCAAC                 |
| P11 | GCTGCAACTGATGATGTGTTAAATGTGTTACTCGAACACTTT              |
| P12 | GTTGCTGCAACTGATGATGTGGCAGATGTGTTACTCGAAC                |
| P13 | GTTTCGAGTAACACATCTGCCACATCATCAGTTGCAGCAAC               |
| P14 | CTGAGCATCCAGATGGAACGGATGCGATTTATTATCCTAGTGATAATAG       |
| P15 | CTATTATCACTAGGATAATAAATCGCATCCGTTCCATCTGGATGCTCAG       |
| P16 | GCATCCAGATGGAACGGATCTGGTTTATTATCCTAGTGATAATAGA          |
| P17 | TCTATTATCACTAGGATAATAAACCAGATCCGTTCCATCTGGATGC          |
| P18 | GTCAAGACCGACCTGTCCGGATCCGCCCTGAATGAACTGC                |
| P19 | GCAGTTCATTCAGGGCGGATCCGGACAGGTCGGTCTTGAC                |
| P20 | GGATCCCAACAGCAGCAACAGCAACAACAG                          |
| P21 | GGATCCCTGCTGTTGTTGCTGTTGCTGCTG                          |
| P22 | GTCATGGTTGAACAAGATGGATTGCACGCAGGTTCTC                   |
| P23 | TCAGAAGAAGCTCGTCAAGAAGGCGATAGAAGGCGATG                  |
| P24 | ATTGTTAATATACCTCTATACTTTAACGTC                          |
| P25 | AGAATCGAGACCGAGGAGAGGGTTAGGGAT                          |
| P26 | CCTAGTGATAATAGAGACAATAGCCCCGAAGGGA                      |
| P27 | TCCCTTCGGGGCTATTGTCTCTATTATCACTAGG                      |
| P28 | GTTGCTGCAACTGATGATGTGGCAGATGTGTTACTCGAACACTT            |
| P29 | AAGTGTTTCGAGTAACACATCTGCCACATCATCAGTTGCAGCAAC           |
| P30 | CGGTTCCGGGAGCAGGGAAGCGAAAAATAGTATTAGTGATT               |
| P31 | AATCACTAATACTATTTTTTCGCTTCCCTGCTCCCGGAACCG              |
| P32 | CATCCAGATGGAACGGATCTGGTCTATTATCCTAGTGATAATA             |
| P33 | TATTATCACTAGGATAATAGACCAGATCCGTTCCATCTGGATG             |
| P34 | GAGCATCCAGATGGAACGGATGCGATCTATTATCCTAGTGATAAT           |
| P35 | ATTATCACTAGGATAATAGATCGCATCCGTTCCATCTGGATGCTC           |
| P36 | GCTGCAACTGATGATGTGTTAAATGTGTTACTCGAACACTTT              |
| P37 | AAAGTGTTTCGAGTAACACATTTAACACATCATCAGTTGCAGC             |
| P38 | ATTACACAGAGGCTGAGTTTGTTC AATTTCTTAAGGAAATTGAAAAAG       |
| P39 | CTTTTTCAATTTCTTAAGAAATTGAACAACTCAGCCTCTGTGTAAT          |
| P40 | TAAGGAAATTGAAAAAGAGAATGCTGCTGCAACTGATGATGTGTTAG         |
| P41 | CTAACACATCATCAGTTGCAGCAGCATTCTTTTTCAATTTCTTA            |
| P42 | TGATTACACAGAGGCTGAGTTTGTTC AAGCTCTTAAGGAAATTGAAAAAGAG   |
| P43 | CTCTTTTTCAATTTCTTAAGAGCTTGAACAACTCAGCCTCTGTGTAATCA      |
| P44 | CTTAAGGAAATTGAAAAAGAGAAGGTTGCTGCAAATGATGATGTGTTAGATGTGT |
| P45 | ACACATCTAACACATCATCTTGCAGCAACCTTCTTTTTCAATTTCTTAAG      |
| P46 | CTTAAGGAAATTGAAAAAGAGAAGGTTGCTGCAACTGATGATGTG           |
| P47 | CACATCATCAGTTGCAGCAACCTTCTTTTTCAATTTCTTAAG              |

|      |                                                      |
|------|------------------------------------------------------|
| P48  | GATCTGATCTATTATCCTAGGGATAATAGAGACGATAGCCC            |
| P49  | GGGCTATCGTCTCTATTATCCCTAGGATAATAGATCAGATC            |
| P50  | TATTAGTGATTACACAGAGGCTGAGGCTGTTCAACTTCTTAAGGAAATTGAA |
| P51  | TTCAATTTCTTAAGAAGTTGAACAGCCTCAGCCTCTGTGTAATCACTAATA  |
| P52  | GATAGCCCCGAAGGGATTGCCAAGGAAATTAAGAATGG               |
| P53  | CCATTCTTTAATTTCTTGGCAATCCCTTCGGGGCTATC               |
| P54  | GTCGCGTTCAAGGCGTCAGTTTTTCGCATGTATACC                 |
| P55  | GGTATACATGCGAAAACACTGACGCCTTGAACGCGAC                |
| P56  | GCACAGTCCCTGAAATCGGTTGATTTTGAAGTCTTTGGT              |
| P57  | ACCAAAGACTTCAAATCAACCGATTTTCAGGGACTGTGC              |
| P58  | GGTCGCGTTCAAGGCGCCTGTTTTTCGCATGTAT                   |
| P59  | ATACATGCGAAAACAGGCGCCTTGAACGCGACC                    |
| P60  | GCCCCAAGATAAAGTTAATTCCGCGAAATCTTGGTTGAGCAAAGTG       |
| P61  | CACTTTGCTCAACCAAGATTTTCGCGGAATTAACTTTATCTTCGGGC      |
| P62  | AATTCATGAAATCTTGGGTGAGCAAAGTGGGTTCGC                 |
| P63  | GCGAACCCACTTTGCTCACCCAAGATTTTCATGGAATT               |
| P64  | GATCGCACGAACTTTAGTAACGATAAGACCATTTCAAATTTGGAATA      |
| P65  | TATTCCAATTTTGAATGGTCTTATCGTTACTAAAGTTCGTGCGATC       |
| P134 | GAATTCACATGGAGGCCAGAATACCC                           |
| P135 | CAGTATAGCGACCAGCATTACGAATTC                          |

**Supplement Table S2:** Thermodynamic stabilities of Im7 variants used in the biosensors

| Im7 variant    | Stability $\Delta\Delta G^{\circ}_{UN}$ (KJ/mol) | $\ln(\text{MIC}_{mut}/\text{MIC}_{WT})$ ANT system | SEM  | $\ln(\text{MIC}_{mut}/\text{MIC}_{WT})$ kan system | SEM  |
|----------------|--------------------------------------------------|----------------------------------------------------|------|----------------------------------------------------|------|
| WT             | 0.00                                             | 0.00                                               | 0.00 | 0.00                                               | 0.00 |
| V33E           | -3.8                                             |                                                    |      | -0.04                                              | 0.03 |
| L34A           | -8.3                                             | -0.60                                              | 0.05 | -0.14                                              | 0.11 |
| I54V           | -6.4                                             | -0.80                                              | 0.02 | -0.48                                              | 0.09 |
| L53A           | -13.6                                            |                                                    |      | -0.73                                              | 0.05 |
| F15A           | -15.2                                            | -2.02                                              | 0.02 | -0.74                                              | 0.13 |
| F84A           | -24.9 *                                          |                                                    |      | -1.21                                              | 0.08 |
| N26K S58R      | 2.05                                             | 0.35                                               | 0.11 |                                                    |      |
| V69A           | -2.30                                            | -0.37                                              | 0.05 |                                                    |      |
| N26K T30N S58R | 5.89                                             | 0.45                                               | 0.02 |                                                    |      |
| L3A            | -4.2                                             | -0.13                                              | 0.04 |                                                    |      |
| I54A           | -13.50                                           | -1.57                                              | 0.01 |                                                    |      |
| D35N D63N      | 5.97                                             | 0.28                                               | 0.05 |                                                    |      |
| V27A D63N      | 3.93                                             | 0.30                                               | 0.04 |                                                    |      |
| L18F D35N D63N | 7.80                                             | 0.18                                               | 0.09 |                                                    |      |
| L18A           | -10.20                                           | -1.94                                              | 0.02 |                                                    |      |

**Supplement Table S3:** Antibiotic resistance of Im7 variants inserted in different permissive sites of ANT

|                | Permissive site 153                     |      | Permissive site 157                     |      | Permissive site 289                     |      |
|----------------|-----------------------------------------|------|-----------------------------------------|------|-----------------------------------------|------|
|                | $\ln(\text{MIC}_{mut}/\text{MIC}_{WT})$ | SEM  | $\ln(\text{MIC}_{mut}/\text{MIC}_{WT})$ | SEM  | $\ln(\text{MIC}_{mut}/\text{MIC}_{WT})$ | SEM  |
| WT             | 0.00                                    | 0.00 | 0.00                                    | 0.00 | 0.00                                    | 0.00 |
| V69A           | -0.06                                   | 0.09 | -0.27                                   | 0.06 | -0.31                                   | 0.12 |
| F15A           | -1.97                                   | 0.02 | -2.24                                   | 0.05 | -3.50                                   | 0.01 |
| L34A           | -0.63                                   | 0.02 | -0.62                                   | 0.08 | -0.78                                   | 0.05 |
| N26K S58R      | 0.29                                    | 0.06 | 0.36                                    | 0.12 | 0.28                                    | 0.20 |
| N26K T30N S58R | 0.25                                    | 0.20 | 0.49                                    | 0.16 | 0.57                                    | 0.27 |

\* Im7 F84A is so destabilized that it mainly populates the unfolded state *in vitro*. This precludes the accurate determination of its  $\Delta G^{\circ}_{UN}$  values (27) For the purposes of this paper it is assumed to be fully unfolded and thus have a  $\Delta G^{\circ}_{UN}$  value = 0 kJ/mol or 24.9 kJ/mol greater than wild type Im7 which has a  $\Delta G^{\circ}_{UN}$  value = -24.9kJ/mol list all strains by number

**Supplement Table S4:** Thermodynamic stabilities and MICs of AcP variants tested in the ANT system

| AcP variant | Stability<br>$\Delta\Delta G^{\circ}_{UN}$ (KJ/mol) | $\ln(\text{MIC}_{mut}/\text{MIC}_{WT})$ | SEM  |
|-------------|-----------------------------------------------------|-----------------------------------------|------|
| C21S        | 0.00                                                | 0.00                                    | 0.00 |
| Y11F C21S   | 1.80                                                | 0.20                                    | 0.07 |
| C21S L65V   | -22.40                                              | -3.57                                   | 0.01 |
| C21S E83D   | -6.30                                               | -0.43                                   | 0.08 |
| C21S V20A   | -1.20                                               | -0.14                                   | 0.05 |
| C21S M61A   | -16.60                                              | -1.84                                   | 0.04 |

**Supplement Table S5** strains and plasmids used in this work

| <b>Strain or plasmid</b> | <b>Genotype</b>                                                                                                                                                                                           | <b>Relevant description or derivation</b> |
|--------------------------|-----------------------------------------------------------------------------------------------------------------------------------------------------------------------------------------------------------|-------------------------------------------|
| NEB10 $\beta$            | $\Delta(ara-leu)$ 7697 <i>araD139 fhuA</i> $\Delta lacX74 galK16 galE15 e14-$ $\phi 80dlacZ\Delta M15$ <i>recA1 relA1 endA1 nupG rpsL</i> (Str <sup>R</sup> ) <i>rph spoT1</i> $\Delta(mrr-hsdRMS-mcrBC)$ |                                           |
| AMS1                     | NEB10 $\beta$ pAMS1                                                                                                                                                                                       |                                           |
| AMS2                     | NEB10 $\beta$ pAMS2                                                                                                                                                                                       |                                           |
| AMS3                     | NEB10 $\beta$ pAMS3                                                                                                                                                                                       |                                           |
| AMS4                     | NEB10 $\beta$ pAMS4                                                                                                                                                                                       |                                           |
| AMS5                     | NEB10 $\beta$ pAMS5                                                                                                                                                                                       |                                           |
| AMS6                     | NEB10 $\beta$ pAMS6                                                                                                                                                                                       |                                           |
| AMS7                     | NEB10 $\beta$ pAMS7                                                                                                                                                                                       |                                           |
| AMS8                     | NEB10 $\beta$ pAMS8                                                                                                                                                                                       |                                           |
| AMS9                     | NEB10 $\beta$ pAMS9                                                                                                                                                                                       |                                           |
| AMS10                    | NEB10 $\beta$ pAMS10                                                                                                                                                                                      |                                           |
| AMS11                    | NEB10 $\beta$ pAMS11                                                                                                                                                                                      |                                           |
| AMS12                    | NEB10 $\beta$ pAMS12                                                                                                                                                                                      |                                           |
| AMS13                    | NEB10 $\beta$ pAMS13                                                                                                                                                                                      |                                           |
| AMS14                    | NEB10 $\beta$ pAMS14                                                                                                                                                                                      |                                           |
| AMS15                    | NEB10 $\beta$ pAMS15                                                                                                                                                                                      |                                           |
| AMS16                    | NEB10 $\beta$ pAMS16                                                                                                                                                                                      |                                           |
| AMS17                    | NEB10 $\beta$ pAMS17                                                                                                                                                                                      |                                           |
| AMS18                    | NEB10 $\beta$ pAMS18                                                                                                                                                                                      |                                           |
| AMS19                    | NEB10 $\beta$ pAMS19                                                                                                                                                                                      |                                           |
| AMS20                    | NEB10 $\beta$ pAMS20                                                                                                                                                                                      |                                           |
| AMS21                    | NEB10 $\beta$ pAMS21                                                                                                                                                                                      |                                           |
| AMS22                    | NEB10 $\beta$ pAMS22                                                                                                                                                                                      |                                           |
| AMS23                    | NEB10 $\beta$ pAMS23                                                                                                                                                                                      |                                           |
| AMS24                    | NEB10 $\beta$ pAMS24                                                                                                                                                                                      |                                           |
| AMS25                    | NEB10 $\beta$ pAMS25                                                                                                                                                                                      |                                           |
| AMS26                    | NEB10 $\beta$ pAMS26                                                                                                                                                                                      |                                           |
| AMS27                    | NEB10 $\beta$ pAMS27                                                                                                                                                                                      |                                           |
| AMS28                    | NEB10 $\beta$ pAMS28                                                                                                                                                                                      |                                           |
| AMS29                    | NEB10 $\beta$ pAMS29                                                                                                                                                                                      |                                           |
| AMS30                    | NEB10 $\beta$ pAMS30                                                                                                                                                                                      |                                           |
| AMS31                    | NEB10 $\beta$ pAMS31                                                                                                                                                                                      |                                           |
| AMS32                    | NEB10 $\beta$ pAMS32                                                                                                                                                                                      |                                           |
| AMS33                    | NEB10 $\beta$ pAMS33                                                                                                                                                                                      |                                           |
| AMS34                    | NEB10 $\beta$ pAMS34                                                                                                                                                                                      |                                           |
| AMS35                    | NEB10 $\beta$ pAMS35                                                                                                                                                                                      |                                           |
| AMS36                    | NEB10 $\beta$ pAMS36                                                                                                                                                                                      |                                           |
| AMS37                    | NEB10 $\beta$ pAMS37                                                                                                                                                                                      |                                           |
| AMS38                    | NEB10 $\beta$ pAMS38                                                                                                                                                                                      |                                           |
| AMS39                    | NEB10 $\beta$ pAMS39                                                                                                                                                                                      |                                           |

| Strain or plasmid          | Genotype                                                                                                                                                                                                            | Relevant description or derivation            |
|----------------------------|---------------------------------------------------------------------------------------------------------------------------------------------------------------------------------------------------------------------|-----------------------------------------------|
| AMS40                      | NEB10β pAMS40                                                                                                                                                                                                       |                                               |
| BL21-codon plus (DE3)-RIPL | E. coli B F <sup>-</sup> ompT hsdS (r <sub>B</sub> <sup>-</sup> m <sub>B</sub> <sup>-</sup> ) dcm + Tet <sup>r</sup> gal λ (DE3) endA Hte [ argU proL Cam <sup>r</sup> ] [ argU ileY leuW Strep/Spec <sup>r</sup> ] | New England Biolabs                           |
| INVSc1                     | <i>MATa his3D1 leu2 trp1-289 ura3-52 MAT his3D1 leu2 trp1-289 ura3-52</i>                                                                                                                                           | Dr. Anuj Kumar (University of Michigan)       |
| AM101                      | NEB10b pAM103                                                                                                                                                                                                       |                                               |
| AM144                      | NEB10b pAM15                                                                                                                                                                                                        |                                               |
| AM152                      | NEB10b p4339                                                                                                                                                                                                        |                                               |
| AM200                      | NEB10b pAM79                                                                                                                                                                                                        |                                               |
| AM201                      | NEB10b pAM80                                                                                                                                                                                                        |                                               |
| AM235                      | BL21-codon plus (DE3)-RIPL pAM107                                                                                                                                                                                   |                                               |
| AM236                      | BL21-codon plus (DE3)-RIPL pAM108                                                                                                                                                                                   |                                               |
| AM240                      | BL21-codon plus (DE3)-RIPL pAM112                                                                                                                                                                                   |                                               |
| AM242                      | BL21-codon plus (DE3)-RIPL pAM114                                                                                                                                                                                   |                                               |
| AM243                      | BL21-codon plus (DE3)-RIPL pAM115                                                                                                                                                                                   |                                               |
| AM246                      | BL21-codon plus (DE3)-RIPL pAM118                                                                                                                                                                                   |                                               |
| AM247                      | BL21-codon plus (DE3)-RIPL pAM119                                                                                                                                                                                   |                                               |
| AM248                      | NEB10b pAM120                                                                                                                                                                                                       |                                               |
| AM249                      | BL21-codon plus (DE3)-RIPL pAM121                                                                                                                                                                                   |                                               |
| AM258                      | BL21-codon plus (DE3)-RIPL pAM130                                                                                                                                                                                   |                                               |
| AM282                      | NEB10b pAM154                                                                                                                                                                                                       |                                               |
| AM283                      | NEB10b pAM155                                                                                                                                                                                                       |                                               |
| AM284                      | NEB10b pAM156                                                                                                                                                                                                       |                                               |
| AM285                      | NEB10b pAM157                                                                                                                                                                                                       |                                               |
| AM286                      | NEB10b pAM158                                                                                                                                                                                                       |                                               |
| AM288                      | NEB10b pAM160                                                                                                                                                                                                       |                                               |
| AM290                      | NEB10b pAM162                                                                                                                                                                                                       |                                               |
| AM291                      | NEB10b pAM163                                                                                                                                                                                                       |                                               |
| AM308                      | NEB10b pAM180                                                                                                                                                                                                       |                                               |
| AM323                      | NEB10b p416-103Q                                                                                                                                                                                                    |                                               |
| aYC-28                     | INVSc1 pAM154                                                                                                                                                                                                       |                                               |
| aYC-29                     | INVSc1 pAM154::ceiE7                                                                                                                                                                                                |                                               |
| aYC-30                     | INVSc1 pAM154::ceiE7F15A                                                                                                                                                                                            |                                               |
| aYC-34                     | INVSc1 pAM154::ceiE7V33E                                                                                                                                                                                            |                                               |
| aYC-35                     | INVSc1 pAM154::ceiE7L34A                                                                                                                                                                                            |                                               |
| aYC-39                     | INVSc1 pAM154::ceiE7I54V                                                                                                                                                                                            |                                               |
| aYC-42                     | INVSc1 pAM154::ceiE7F84A                                                                                                                                                                                            |                                               |
| aYC-43                     | INVSc1 pYES2.1/V5-His-TOPO::LacZ                                                                                                                                                                                    |                                               |
| aYC-44                     | INVSc1 pAM154::Q20                                                                                                                                                                                                  |                                               |
| aYC-46                     | INVSc1 pAM154::Q87                                                                                                                                                                                                  |                                               |
| aYC-47                     | INVSc1 pYES2.1/V5-His-TOPO::nat1aa80::ceiE7 F15A                                                                                                                                                                    | Im7 F15A inserted after amino acid 80 of nat1 |

| Strain or plasmid | Genotype                                                  | Relevant description or derivation                                   |
|-------------------|-----------------------------------------------------------|----------------------------------------------------------------------|
| aYC-48            | INVSc1 pYES2.1/V5-His-TOPO::nat1aa80::ceiE7               | Im7 wt inserted after amino acid 80 of nat1                          |
| aYC-50            | INVSc1 pYES2.1/V5-His-TOPO::nat1aa80::ceiE7D63N           | Im7 D63N inserted after amino acid 80 of nat1                        |
| aYC-51            | INVSc1 pYES2.1/V5-His-TOPO::nat1aa80::ceiE7D63N,D35N      | Im7 D63N, D35N inserted after amino acid 80 of nat1                  |
| aYC-52            | INVSc1 pYES2.1/V5-His-TOPO::nat1aa80::ceiE7D63N,D35N,L18F | Im7 D63N, D35N, L18F inserted after amino acid 80 of nat1            |
| aYC-53            | INVSc1 pYES2.1/V5-His-TOPO::nat1                          | nat1 cloned on pYES2.1 vector                                        |
| pAMS1             | pBR322::aadA                                              | aadA (encoding StrepR) from pBAD43 cloned into pBR322 using Hind III |
| pAMS2             | pAMS1 aadAaa155::ceiE7                                    | ceiE7 (gene encoding Im7) inserted after amino acid 155 of aadA      |
| pAMS3             | pAMS1 aadAaa155::linker                                   | Linker inserted after amino acid 155 of aadA (encoding StrepR)       |
| pAMS4             | pAMS 2 aadAaa155::ceiE7L34A                               | Im7 L34A inserted after amino acid 155 of aadA                       |
| pAMS5             | pAMS2 ceiE7I54V                                           | Im7 I54V inserted after amino acid 155 of aadA                       |
| pAMS6             | pAMS2 ceiE7F15A                                           | Im7 F15A inserted after amino acid 155 of aadA                       |
| pAMS7             | pAMS2 ceiE7N26K S58R                                      | Im7 N26K S58R inserted after amino acid 155 of aadA                  |
| pAMS8             | pAMS2 ceiE7V69A                                           | Im7 V69A inserted after amino acid 155 of aadA                       |
| pAMS9             | pAMS2 N26KT30NS58R                                        | Im7 N26K T30N S58R inserted after amino acid 155 of aadA             |
| pAMS10            | pAMS2 ceiE7L3A                                            | Im7 L3A inserted after amino acid 155 of aadA                        |
| pAMS11            | pAMS2 ceiE7I54A                                           | Im7 I54A inserted after amino acid 155 of aadA                       |
| pAMS12            | pAMS2 ceiE7D35ND63N                                       | Im7 D35N D63N inserted after amino acid 155 of aadA                  |
| pAMS13            | pAMS2 ceiE7V27AD63N                                       | Im7 V27A D63N inserted after amino acid 155 of aadA                  |
| pAMS14            | pAMS2 ceiE7L18FD35ND63N                                   | Im7 L18F D35N D63N inserted after amino acid 155 of aadA             |
| pAMS15            | pAMS2 ceiEL18A                                            | Im7 L18A inserted after amino acid 155 of aadA                       |
| pAMS16            | pBR322::aadAaa153::ceiE7                                  | ceiE7 (gene encoding Im7) inserted after amino acid 153 of aadA      |
| pAMS17            | pAMS16 ceiE7V69A                                          | Im7 V69A inserted after amino acid 153 of aadA                       |
| pAMS18            | pAMS16ceiE7F15A                                           | Im7 F15A inserted after amino acid 153 of aadA                       |
| pAMS19            | pAMS16ceiE7L34A                                           | Im7 L34A inserted after amino acid 153 of aadA                       |
| pAMS20            | pAMS16 ceiE7N26KS58R                                      | Im7 N26K S58R inserted after amino acid 153 of aadA                  |
| pAMS21            | pAMS16 ceiE7N26KT30NS58R                                  | Im7 N26K T30N S58R inserted after amino acid 153 of aadA             |
| pAMS22            | pBR322::aadAaa157::ceiE7                                  | ceiE7 (gene encoding Im7) inserted after amino acid 157 of aadA      |
| pAMS23            | pAMS22 ceiE7V69A                                          | Im7 V69A inserted after amino acid 157 of aadA                       |
| pAMS24            | pAMS22 ceiE7F15A                                          | Im7 F15A inserted after amino acid 157 of aadA                       |



| Strain or plasmid | Genotype                    | Relevant description or derivation                                                                                |
|-------------------|-----------------------------|-------------------------------------------------------------------------------------------------------------------|
| pAMS25            | pAMS22 ceiE7L34A            | Im7 L34A inserted after amino acid 157 of aadA                                                                    |
| pAMS26            | pAMS22 ceiE7N26KS58R        | Im7 N26K S58R Im7 inserted after amino acid 157 of aadA                                                           |
| pAMS27            | pAMS22ceiE7N26KT30NS58R     | Im7 N26K T30N S58R Im7 inserted after amino acid 157 of aadA                                                      |
| pAMS28            | pBR322::aadAaa289::ceiE7    | ceiE7 (gene encoding Im7) inserted after amino acid 289 of aadA                                                   |
| pAMS29            | pAMS28 ceiE7V69A            | Im7 V69A inserted after amino acid 289 of aadA                                                                    |
| pAMS30            | pAMS28 ceiE7F15A            | Im7 F15A inserted after amino acid 289 of aadA                                                                    |
| pAMS31            | pAMS28 ceiE7L34A            | Im7 L34A inserted after amino acid 289 of aadA                                                                    |
| pAMS32            | pAMS28 ceiE7N26KS58R        | Im7 N26K S58R inserted after amino acid 289 of aadA                                                               |
| pAMS33            | pAMS28 ceiE7N26KT30NS58R    | Im7 N26K T30N S58R inserted after amino acid 289 of aadA                                                          |
| pAMS34            | pAMS1 aadAaa155::acpy2      | Acyp2 encoding AcP inserted after amino acid 155 of aadA                                                          |
| pAMS35            | pAMS34 acpy2C21S            | AcP C21S AcP inserted after amino acid 155 of aadA                                                                |
| pAMS36            | pAMS34 acpy2Y11FC21S        | AcP Y11F C21S AcP inserted after amino acid 155 of aadA                                                           |
| pAMS37            | pAMS34 acpy2C21SL65V        | AcP C21S L65V AcP inserted after amino acid 155 of aadA                                                           |
| pAMS38            | pAMS34 acpy2C21SE83D        | AcP C21S E83D AcP inserted after amino acid 155 of aadA                                                           |
| pAMS39            | pAMS34 acpy2V20AC21S        | AcP C21S V20A AcP inserted after amino acid 155 of aadA                                                           |
| pAMS40            | pAMS34 acpy2C21SM61A        | AcP C21S M61A AcP inserted after amino acid 155 of aadA                                                           |
| pAM 15            | pCR-Blunt II-TOPO- ccdB5    | Point mutation in <i>ccdB</i> gene at amino acid 5 to introduce stop codon and NsiI digested and religated vector |
| pAM 18            | pCR-Blunt II-TOPO- subclone | Subclone on pCR-Blunt II-TOPO- vector                                                                             |
| pAM 79            | pAM15aphA-2aa55::Q20        | polyQ(20) inserted after amino acid 55 of aphA-2                                                                  |
| pAM 80            | pAM15aphA-2aa55::Q45        | polyQ(45) inserted after amino acid 55 of aphA-2                                                                  |
| pAM 81            | pAM15aphA-2aa55::Q81        | polyQ(87) inserted after amino acid 55 of aphA-2                                                                  |
| pAM 103           | pBR322::nat1                | nat1 (encoding ClonNAT resistance) from plasmid p4339 (or pAM31) cloned into pBR322 using EcoRI                   |
| pAM 107           | pAM15aphA-2aa55::ceiE7      | ceiE7 (gene encoding Im7) inserted after amino acid 55 of aphA-2                                                  |
| pAM 108           | pAM15aphA-2aa55::ceiE7 F84A | Im7 F84A inserted after amino acid 55 of aphA-2                                                                   |
| pAM 112           | pAM15aphA-2aa55::ceiE7 V33E | Im7 V33E inserted after amino acid 55 of aphA-2                                                                   |
| pAM 114           | pAM15aphA-2aa55::ceiE7 L53A | Im7 L53A inserted after amino acid 55 of aphA-2                                                                   |
| pAM 115           | pAM15aphA-2aa55::ceiE7 I54V | Im7 I54V inserted after amino acid 55 of aphA-2                                                                   |
| pAM 118           | pAM15aphA-2aa42::ceiE7 F84A | Im7 F84A inserted after amino acid 42 of aphA-2                                                                   |
| pAM 119           | pAM15aphA-2aa55::ceiE7 F15A | Im7 F15A inserted after amino acid 55 of aphA-2                                                                   |

| <b>Strain or plasmid</b> | <b>Genotype</b>                             | <b>Relevant description or derivation</b>                               |
|--------------------------|---------------------------------------------|-------------------------------------------------------------------------|
| pAM 120                  | pBR322 bla196::ceiE7 F84A                   | Im7 F84A inserted after amino acid 196 of bla in pBR322                 |
| pAM 121                  | pAM15aphA-2aa21::ceiE7 F84A                 | Im7 F84A inserted after amino acid 21 of aphA-2                         |
| pAM 130                  | pAM15aphA-2aa55::ceiE7 L34A                 | Im7 L34A inserted after amino acid 55 of aphA-2                         |
| pAM 154                  | pYES2.1/V5-His-TOPO::aphA-2                 | aphA-2 (encoding Kan resistance) cloned in pYES2.1/V5-His-TOPO          |
| pAM 155                  | pYES2.1/V5-His-TOPO::aphA-2aa55::ceiE7      | Im7 inserted after amino acid 55 of aphA-2 in pYES2.1/V5-His-TOPO       |
| pAM 156                  | pYES2.1/V5-His-TOPO::aphA-2aa55::ceiE7 F84A | Im7 F84A inserted after amino acid 55 of aphA-2 in pYES2.1/V5-His-TOPO  |
| pAM 157                  | pYES2.1/V5-His-TOPO::aphA-2aa55::ceiE7 F15A | Im7 F15A inserted after amino acid 55 of aphA-2 in pYES2.1/V5-His-TOPO  |
| pAM 158                  | pYES2.1/V5-His-TOPO::aphA-2aa55::Q20        | polyQ(20) inserted after amino acid 55 of aphA-2 in pYES2.1/V5-His-TOPO |
| pAM 160                  | pYES2.1/V5-His-TOPO::aphA-2aa55::Q87        | polyQ(87) inserted after amino acid 55 of aphA-2 in pYES2.1/V5-His-TOPO |
| pAM 162                  | pAM15aphA-2aa55::ceiE7 V33E                 | Im7 V33E inserted after amino acid 55 of aphA-2 in pYES2.1/V5-His-TOPO  |
| pAM 163                  | pYES2.1/V5-His-TOPO::lacZ                   | lacZ gene coding for beta-galactosidase cloned in                       |
| pAM 180                  | pAM15aphA-2 (SDM41-43)aa55::Q87             | polyQ(87) inserted in silent mutated aphA-2 variant after amino acid 55 |
| p416-103Q                |                                             | (14)                                                                    |
| pGPS4                    | New England Biolab                          |                                                                         |
| p4339                    | pCR-TOPO::natR-MX4                          | Dr. Charles Boone lab (U Toronto),                                      |

The source of all strains and plasmids is this study with the exception of NEB10 $\beta$  and BL21 which were obtained from New England Biolabs.
